# Supplementary material for: Dispersal and Space Use of Captive-Reared and Wild-Rehabilitated Harpy Eagles Released in Central American Landscapes: Implications for Reintroduction and Reinforcement Management
Source: MDPI journal article supplement (doi:10.3390/d14100886), 2022-10-20
Supplement: s1 [file s1]

**Dispersal and space use of captive-reared and wild-rehabilitated Harpy Eagles released in Central American landscapes: Implications for reintroduction and reinforcement management**

Adrián Naveda-Rodríguez<sup>1,2,3\*</sup>, Edwin Campbell-Thompson<sup>1</sup>, Richard Watson<sup>1</sup>, Jennifer McCabe<sup>1</sup> and Félix Hernán Vargas<sup>1</sup>

<sup>1</sup>The Peregrine Fund, 5668 West Flying Hawk Lane, Boise, ID 83709, USA

<sup>2</sup>Wildlife Conservation Society, Ecuador Program, Quito, Ecuador.

<sup>3</sup>Department of Wildlife, Fisheries and Aquaculture, Mississippi State University, MS 39762, USA.

\*Corresponding author: [adrian.naveda@gmail.com](mailto:adrian.naveda@gmail.com)

**Organizations and individuals that provided financial and logistic assistance during the Harpy Eagle Trial Restoration Program.**

U.S. Agency for International Development (USAID), Archie W. and Grace Berry Foundation, Burns Family Foundation, Butler Foundation, CEMEX Panama, Jim and Barbara Cimino, Liz Claiborne and Art Ortenberg Foundation, Disney Worldwide Conservation Fund, Walt Disney Company, Foundation, Evie Donaldson, Charles Engelhard Foundation, Exxon Mobil, Foundation, Greater Los Angeles Zoo, Association, Howard Gilman Foundation, Houston Zoo, Jaco Lacs, Diane A. Ledder Charitable Trust, Ledder Family Charitable Trust, Mr. and Mrs. Peter Manigault, Ruth O. Mutch, Newman's Own Organics, Norcross Wildlife Foundation, Offield Family Foundation, Paxson H. Offield, Pennzoil-Quaker State Company, Don Tyson, Wallace Genetic Foundation, Julie A. Wrigley, Wolf Creek Charitable Foundation, Zoological Society of San Diego, and other important donors. We collaborated with many individuals and organizations, including, in the U.S.A., Los Angeles Zoo, Cheyenne Mountain Zoo, Oklahoma City Zoo, Fort Worth Zoo, San Diego Zoo, and Pat Redig at the University of Minnesota Raptor Center; in Panama, Summit Garden Zoo, Instituto Nacional de Recursos Naturales Renovables (INRENARE), Asociacion Nacional para la Conservacion de la Naturaleza (ANCON), National Environmental Authority (ANAM), Minera Panama S.A., Panama Canal Authority (ACP), City of Knowledge, Ecological Police, Jaco Lacs, and Monica Brenes; in Belize, the Belize Zoo, Programme for Belize, and the Belize Forestry Department's Wildlife Conservation Division; in Guatemala, Tikal National Park, ARCAS Wildlife Rescue Center, Wildlife Conservation Society, and CONAP; in Ecuador, Nancy Hilgert de Benavides, Mauricio Guerrero, and the late Fernando Ortiz of Corporacion Ornitologica del Ecuador (CECIA, now Aves y Conservacion); in Venezuela, the Quivens family, Venezuelan Hydroelectric Company (EDELCA), Venezuelan International Airline (VIASA), and Mr. Oliva.

Table S1. Maximum post-release dispersal distance (km), core areas (50% AKDE, km<sup>2</sup>) and home ranges (95% AKDE, km<sup>2</sup>) of captive-reared and wild-rehabilitated Harpy Eagles (*Harpia harpyja*) released in Central American forest between 2002 and 2009. Numbers in parentheses correspond to 95% nonparametric bootstrap confidence intervals. *n* is the number of individual in each group.

|                          | <i>n</i> | Dispersal        | Core area        | Home range         |
|--------------------------|----------|------------------|------------------|--------------------|
| Adult                    | 18       | 41.5 (31.2-54.2) | 392.3 (232-730)  | 1645 (990-3021)    |
| Juvenile                 | 18       | 13.9 (7.6-34.7)  | 13.12(6-24)      | 59.1 (28-113)      |
| Female                   | 20       | 29.1 (21.2-38.9) | 320.3 (168-650)  | 1327.9 (711-2745)  |
| Male                     | 16       | 29.8 (17.2-54.3) | 120 (26-368)     | 534.7 (118-1348)   |
| 6-7 m                    | 10       | 28 (17.5-43.6)   | 383.2 (129-1085) | 1598.8 (593-4812)  |
| 18-23 m                  | 11       | 27.2 (17-43.9)   | 238.8 (93-504)   | 981.6 (384-2040)   |
| >30 m                    | 10       | 43.8 (22.7-78.8) | 188.8 (64-403)   | 815.5 (292-1779)   |
| Adult Wild-rehabilitated | 5        | 14.6 (10.4-19.8) | 42.9 (19-77)     | 205 (90-356)       |
| Hard                     | 17       | 46.5 (35-63.3)   | 433 (244-875)    | 1825.2 (1046-3608) |
| Soft                     | 19       | 11.8 (7.3-19.5)  | 68.6 (21-219)    | 281.8 (87-872)     |

AKDE = autocorrelated kernel density estimation

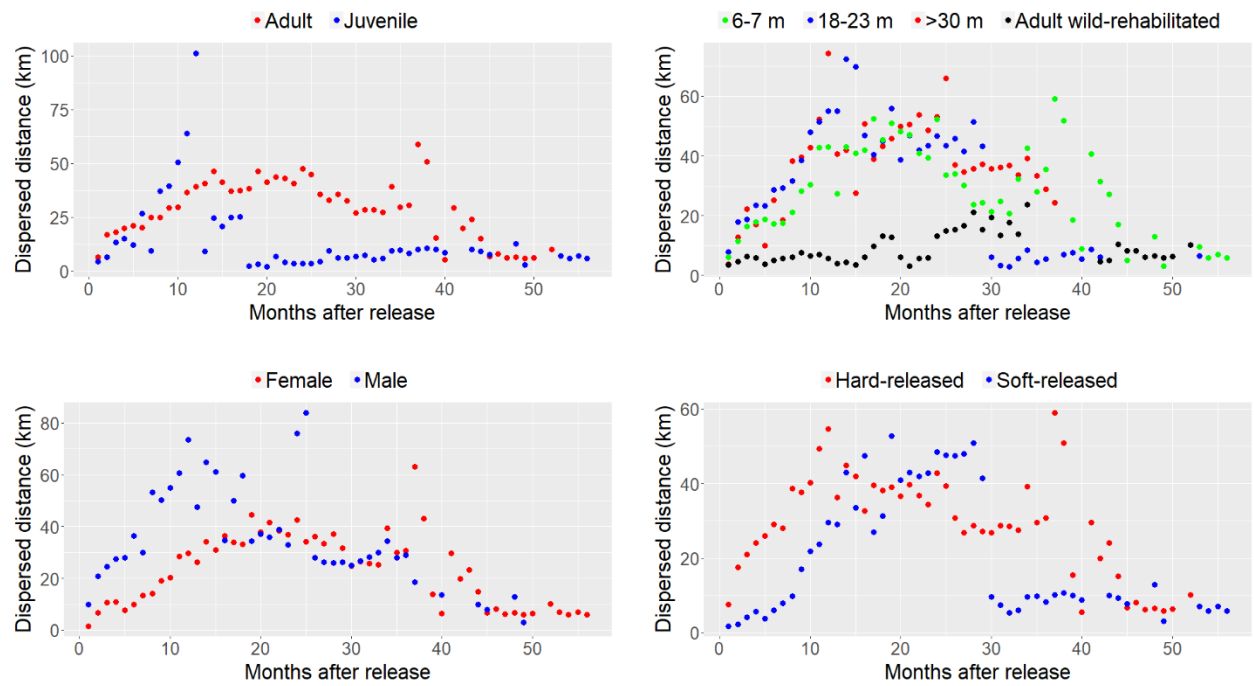

Figure S1. Average net-squared displacement of 36 captive-reared and wild-rehabilitated Harpy Eagles (*Harpia harpyja*) released in Central American forest between 2002 and 2009. Each point represents the average dispersal distance by month.

Table S2. List of the telemetry-tracked Harpy Eagles released in Central America with information on bird ID and and year of study, tracking time in days (TTd), home ranging behavior (HRB), number of telemetry fixes (Fixes), sex, release site, release method, age at release, age when included in the analysis, dispersed distance in km, core are in km<sup>2</sup>, home range in km<sup>2</sup>, home range protected in km<sup>2</sup> and proportion of home range protected in percentage.

| Bird and Year | TTd | HRB | Fixes | Sex    | Release Site | Release Method | Age at Release     | Dispersed Distance | Core Area | Home Range | Home Range Protected | Proportion of Home Range Protected |
|---------------|-----|-----|-------|--------|--------------|----------------|--------------------|--------------------|-----------|------------|----------------------|------------------------------------|
| AT 2007       | 362 | Yes | 327   | Male   | Belize       | Hard-release   | 6-7 months         | 61.4               | 180.3     | 1243.7     | 307.0                | 24.7                               |
| BC 2008       | 335 | Yes | 65    | Male   | Belize       | Hard-release   | 18-23 months       | 28.0               | 10.5      | 52.5       | 0.0                  | 0.0                                |
| BM 2010       | 361 | Yes | 341   | Male   | Belize       | Hard-release   | 18-23 months       | 106.3              | 1066.4    | 4322.8     | 2314.5               | 53.5                               |
| BN 2008       | 264 | Yes | 125   | Male   | Panama       | Soft-release   | 18-23 months       | 15.2               | 2.79      | 18.6       | 0.0                  | 0.0                                |
| BY 2004       | 264 | Yes | 9     | Male   | Panama       | Soft-release   | 6-7 months         | 2.7                | 0.5       | 2.7        | 2.7                  | 100.0                              |
| BY 2005       | 334 | Yes | 18    | Male   | Panama       | Soft-release   | 6-7 months         | 4.7                | 0.9       | 4.9        | 4.8                  | 97.6                               |
| BZ 2004       | 340 | Yes | 9     | Male   | Panama       | Soft-release   | 6-7 months         | 1.2                | 0.3       | 1.4        | 1.4                  | 100                                |
| BZ 2005       | 358 | Yes | 40    | Male   | Panama       | Soft-release   | 6-7 months         | 16.6               | 36.5      | 135.09     | 110.6                | 81.9                               |
| CN 2004       | 348 | Yes | 4     | Male   | Panama       | Soft-release   | 6-7 months         | 1.5                | 0.9       | 3.2        | 3.2                  | 100                                |
| CN 2005       | 350 | Yes | 24    | Male   | Panama       | Soft-release   | 6-7 months         | 13.1               | 20.1      | 74.6       | 61.4                 | 82.4                               |
| CN 2006       | 284 | Yes | 20    | Male   | Panama       | Soft-release   | 6-7 months         | 13.5               | 8.6       | 36.1       | 27.1                 | 75.0                               |
| CP 2007       | 181 | Yes | 6     | Male   | Panama       | Soft-release   | >30 months         | 8.4                | 17.8      | 82.9       | 61.1                 | 73.7                               |
| CP 2008       | 194 | Yes | 12    | Male   | Panama       | Soft-release   | >30 months         | 8.7                | 36.3      | 145.9      | 89.8                 | 61.5                               |
| CU 2007       | 191 | Yes | 9     | Male   | Panama       | Soft-release   | >30 months         | 12.8               | 11.4      | 55.07      | 30.0                 | 54.5                               |
| DM 2005       | 220 | Yes | 74    | Male   | Belize       | Hard-release   | >30 months         | 16.2               | 40.4      | 234.7      | 234.7                | 100                                |
| DT 2007       | 362 | Yes | 108   | Male   | Belize       | Hard-release   | >30 months         | 151.0              | 926.7     | 4077.4     | 3563.3               | 87.4                               |
| DT 2008       | 308 | Yes | 322   | Male   | Belize       | Hard-release   | >30 months         | 51.2               | 35.1      | 164.2      | 77.2                 | 47.0                               |
| ET 2003       | 290 | Yes | 7     | Male   | Panama       | Soft-release   | 6-7 months         | 0.4                | 0.05      | 0.1        | 0.1                  | 100                                |
| ET 2004       | 321 | Yes | 10    | Male   | Panama       | Soft-release   | 6-7 months         | 1.4                | 0.3       | 1.8        | 1.8                  | 100                                |
| GB 2006       | 206 | Yes | 34    | Female | Panama       | Soft-release   | >30 months         | 2.6                | 0.8       | 4.1        | 4.1                  | 100                                |
| GD 2006       | 187 | Yes | 65    | Female | Panama       | Soft-release   | >30 months         | 2.9                | 2.2       | 8.5        | 8.5                  | 100                                |
| GD 2007       | 283 | Yes | 99    | Female | Panama       | Soft-release   | >30 months         | 5.9                | 3.4       | 16.08      | 16.1                 | 100                                |
| HE 2006       | 325 | Yes | 34    | Female | Panama       | Hard-release   | Wild-rehabilitated | 4.0                | 3.3       | 14.3       | 13.8                 | 96.2                               |
| HE 2007       | 287 | Yes | 23    | Female | Panama       | Hard-release   | Wild-rehabilitated | 5.3                | 2.2       | 10.7       | 10.7                 | 100                                |
| HH 2006       | 328 | Yes | 92    | Female | Panama       | Hard-release   | 18-23 months       | 6.7                | 3.2       | 23.07      | 22.4                 | 97.3                               |
| HH 2007       | 364 | Yes | 110   | Female | Panama       | Hard-release   | 18-23 months       | 6.9                | 6.5       | 29.7       | 26.6                 | 89.5                               |
| HH 2008       | 361 | Yes | 97    | Female | Panama       | Hard-release   | 18-23 months       | 9.8                | 20.6      | 79.01      | 76.2                 | 96.4                               |
| HH 2009       | 213 | Yes | 40    | Female | Panama       | Hard-release   | 18-23 months       | 11.8               | 20.6      | 80.3       | 62.1                 | 77.4                               |
| HS 2005       | 191 | Yes | 6     | Female | Belize       | Hard-release   | 18-23 months       | 47.9               | 737.3     | 3134.2     | 524.5                | 16.7                               |
| KC 2009       | 302 | Yes | 228   | Female | Panama       | Soft-release   | 18-23 months       | 55.0               | 1114.2    | 4684.8     | 1559.3               | 33.3                               |
| KC 2010       | 358 | Yes | 295   | Female | Panama       | Soft-release   | 18-23 months       | 75.4               | 280.1     | 1043.4     | 399.7                | 38.3                               |
| KC 2011       | 212 | Yes | 166   | Female | Panama       | Soft-release   | 18-23 months       | 72.4               | 225.04    | 863.1      | 309.7                | 35.9                               |
| KD 2007       | 330 | Yes | 40    | Female | Panama       | Soft-release   | 18-23 months       | 5.7                | 6.01      | 20.3       | 16.4                 | 80.9                               |
| KD 2008       | 354 | Yes | 39    | Female | Panama       | Soft-release   | 18-23 months       | 6.8                | 5.9       | 26.6       | 17.8                 | 66.8                               |
| KR 2008       | 274 | Yes | 45    | Male   | Panama       | Soft-release   | >30 months         | 7.3                | 5.3       | 36.6       | 35.9                 | 98.1                               |
| LB 2007       | 179 | Yes | 54    | Female | Panama       | Soft-release   | 18-23 months       | 4.1                | 1.1       | 5.9        | 5.9                  | 100                                |
| LB 2008       | 348 | Yes | 30    | Female | Panama       | Soft-release   | 18-23 months       | 20.5               | 83.07     | 341.2      | 201.1                | 58.9                               |
| LG 2006       | 346 | Yes | 251   | Female | Belize       | Hard-release   | >30 months         | 47.3               | 886.9     | 3565.4     | 1806.9               | 50.7                               |
| LG 2007       | 363 | Yes | 269   | Female | Belize       | Hard-release   | >30 months         | 52.8               | 225.04    | 958.5      | 150.8                | 15.7                               |
| LG 2008       | 331 | Yes | 265   | Female | Belize       | Hard-release   | >30 months         | 77.7               | 640.01    | 2875.09    | 658.8                | 22.9                               |
| LT 2008       | 269 | Yes | 68    | Female | Panama       | Soft-release   | >30 months         | 5.7                | 1.1       | 5.4        | 5.4                  | 100                                |
| LT 2009       | 287 | Yes | 44    | Female | Panama       | Soft-release   | >30 months         | 3.2                | 0.8       | 4.07       | 4.1                  | 100                                |
| LV 2009       | 295 | Yes | 275   | Female | Panama       | Hard-release   | Wild-rehabilitated | 10.3               | 22.3      | 91.8       | 75.5                 | 82.3                               |
| LV 2010       | 356 | Yes | 314   | Female | Panama       | Hard-release   | Wild-rehabilitated | 15.9               | 59.5      | 249.7      | 136.0                | 54.4                               |
| MA 2003       | 234 | Yes | 13    | Female | Panama       | Soft-release   | 6-7 months         | 6.4                | 10.3      | 44.4       | 35.1                 | 79.1                               |
| MA 2005       | 293 | Yes | 17    | Female | Panama       | Soft-release   | 6-7 months         | 11.4               | 46.1      | 226.05     | 123.4                | 54.6                               |
| MU 2008       | 365 | Yes | 51    | Female | Belize       | Hard-release   | 6-7 months         | 24.2               | 278.8     | 1108.3     | 294.0                | 26.5                               |

Table S2 (cont.)

| Bird and Year | TTd | HRB | Fixes | Sex    | Release Site | Release Method | Age at Release     | Dispersed Distance | Core Area | Home Range | Home Range Protected | Proportion of Home Range Protected |
|---------------|-----|-----|-------|--------|--------------|----------------|--------------------|--------------------|-----------|------------|----------------------|------------------------------------|
| MV 2006       | 265 | Yes | 53    | Female | Belize       | Hard-release   | Wild-rehabilitated | 9.8                | 25.2      | 155.5      | 128.8                | 82.8                               |
| MW 2005       | 296 | Yes | 56    | Female | Panama       | Hard-release   | Wild-rehabilitated | 28.2               | 67.8      | 415.3      | 335.6                | 80.8                               |
| MW 2006       | 195 | Yes | 69    | Female | Panama       | Hard-release   | Wild-rehabilitated | 17.8               | 120.05    | 498.1      | 437.9                | 87.9                               |
| MX 2005       | 313 | Yes | 114   | Female | Belize       | Hard-release   | 6-7 months         | 46.1               | 307.03    | 1202.4     | 616.4                | 51.3                               |
| MX 2007       | 254 | Yes | 122   | Female | Belize       | Hard-release   | 6-7 months         | 96.0               | 1447.6    | 6466.6     | 3405.3               | 52.7                               |
| MY 2007       | 362 | Yes | 207   | Female | Belize       | Hard-release   | 6-7 months         | 107.7              | 3558.05   | 14033.1    | 8331.1               | 59.4                               |
| MY 2008       | 363 | Yes | 171   | Female | Belize       | Hard-release   | 6-7 months         | 56.1               | 636.1     | 2586.3     | 1218.4               | 47.1                               |
| MY 2009       | 214 | Yes | 74    | Female | Belize       | Hard-release   | 6-7 months         | 45.2               | 572.4     | 2392.8     | 1273.9               | 53.2                               |
| AC 2005       | 88  | No  | 34    | Male   | Belize       | Hard-release   | Wild-rehabilitated | 23.0               | NA        | NA         | NA                   | NA                                 |
| AT 2006       | 151 | No  | 159   | Male   | Belize       | Hard-release   | 6-7 months         | 22.5               | NA        | NA         | NA                   | NA                                 |
| BN 2007       | 107 | No  | 51    | Male   | Panama       | Soft-release   | 18-23 months       | 10.7               | NA        | NA         | NA                   | NA                                 |
| BZ 2003       | 168 | No  | 6     | Male   | Panama       | Soft-release   | 6-7 months         | 1.3                | NA        | NA         | NA                   | NA                                 |
| CN 2003       | 163 | No  | 8     | Male   | Panama       | Soft-release   | 6-7 months         | 0.9                | NA        | NA         | NA                   | NA                                 |
| CZ 2005       | 349 | No  | 175   | Male   | Belize       | Hard-release   | >30 months         | 179.7              | NA        | NA         | NA                   | NA                                 |
| DK 2006       | 62  | No  | 9     | Male   | Panama       | Soft-release   | 18-23 months       | 3.1                | NA        | NA         | NA                   | NA                                 |
| DK 2008       | 104 | No  | 8     | Male   | Panama       | Soft-release   | 18-23 months       | 14.7               | NA        | NA         | NA                   | NA                                 |
| DT 2006       | 359 | No  | 82    | Male   | Belize       | Hard-release   | >30 months         | 111.4              | NA        | NA         | NA                   | NA                                 |
| ET 2005       | 99  | No  | 7     | Male   | Panama       | Soft-release   | 6-7 months         | 5.9                | NA        | NA         | NA                   | NA                                 |
| HC 2007       | 139 | No  | 67    | Female | Panama       | Soft-release   | 18-23 months       | 8.5                | NA        | NA         | NA                   | NA                                 |
| HE 2009       | 131 | No  | 34    | Female | Panama       | Hard-release   | Wild-rehabilitated | 11.2               | NA        | NA         | NA                   | NA                                 |
| HE 2010       | 152 | No  | 17    | Female | Panama       | Hard-release   | Wild-rehabilitated | 10.2               | NA        | NA         | NA                   | NA                                 |
| HS 2006       | 292 | No  | 8     | Female | Belize       | Hard-release   | 18-23 months       | 60.2               | NA        | NA         | NA                   | NA                                 |
| KK 2005       | 93  | No  | 9     | Female | Panama       | Soft-release   | 6-7 months         | 6.2                | NA        | NA         | NA                   | NA                                 |
| LA 2007       | 37  | No  | 16    | Female | Panama       | Soft-release   | 18-23 months       | 1.9                | NA        | NA         | NA                   | NA                                 |
| LV 2011       | 363 | No  | 334   | Female | Panama       | Hard-release   | Wild-rehabilitated | 25.9               | NA        | NA         | NA                   | NA                                 |
| MU 2007       | 62  | No  | 66    | Female | Belize       | Hard-release   | 6-7 months         | 21.2               | NA        | NA         | NA                   | NA                                 |
| MX 2006       | 364 | No  | 159   | Female | Belize       | Hard-release   | 6-7 months         | 55.1               | NA        | NA         | NA                   | NA                                 |
| MY 2006       | 362 | No  | 165   | Female | Belize       | Hard-release   | 6-7 months         | 105.7              | NA        | NA         | NA                   | NA                                 |
